# Supplementary material for: The Beneficial Impact of Mineral Content in Spent-Coffee-Ground-Derived Hard Carbon on Sodium-Ion Storage
Source: MDPI journal article supplement (doi:10.3390/ma17051016), 2024-02-22
Supplement: s1 [file s1]

## Supplementary Materials

# The Beneficial Impact of Mineral Content in Spent-Coffee-Ground-Derived Hard Carbon on Sodium-Ion Storage

Sonya Harizanova, Ivan Uzunov, Lyubomir Aleksandrov, Maria Shipochka, Ivanka Spassova and Mariya Kalapsazova \*

Institute of General and Inorganic Chemistry, Bulgarian Academy of Sciences, 4000 Plovdiv, Bulgaria; sonya@svr.igic.bas.bg (S.H.); uzunov\_iv@svr.igic.bas.bg (I.U.); lubomir@svr.igic.bas.bg (L.A.); shipochka@svr.igic.bas.bg (M.S.); ispasova@svr.igic.bas.bg (I.S.)

\* Correspondence: maria\_l\_k@svr.igic.bas.bg

**Table S1.** Moisture and ash content in the SCGs, and carbon yields after pyrolysis.

|                                 | Coffee         |    | TC | TCZ | PC | PCZ |
|---------------------------------|----------------|----|----|-----|----|-----|
|                                 | O <sub>2</sub> | Ar | Ar |     |    |     |
| Moisture TAPPI T550, m. %       | 8.1            |    |    |     |    |     |
| Moisture DTA/TGA, m. %          | 10             | 11 |    |     |    |     |
| Volatile matters DTA/TGA, m %   | 86             | 71 |    |     |    |     |
| Solid residue DTA/TGA, m. %     | 4              | 18 |    |     |    |     |
| Ash content TAPPI T211, m. %    | 2.1            |    |    |     |    |     |
| Mass loss DTA/TGA, m. %         |                |    | 21 | 58  | 27 | 42  |
| Mass loss after pyrolysis, m. % |                |    | 18 | 48  | 17 | 55  |
| Yield after pyrolysis, m. %     |                |    | 82 | 51  | 82 | 45  |

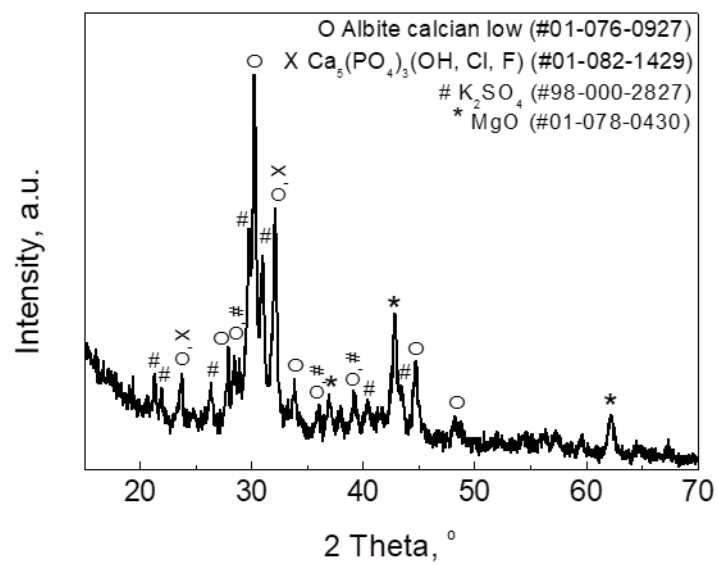

**Figure S1.** XRD pattern of the SCG-derived ash at 525 °C.

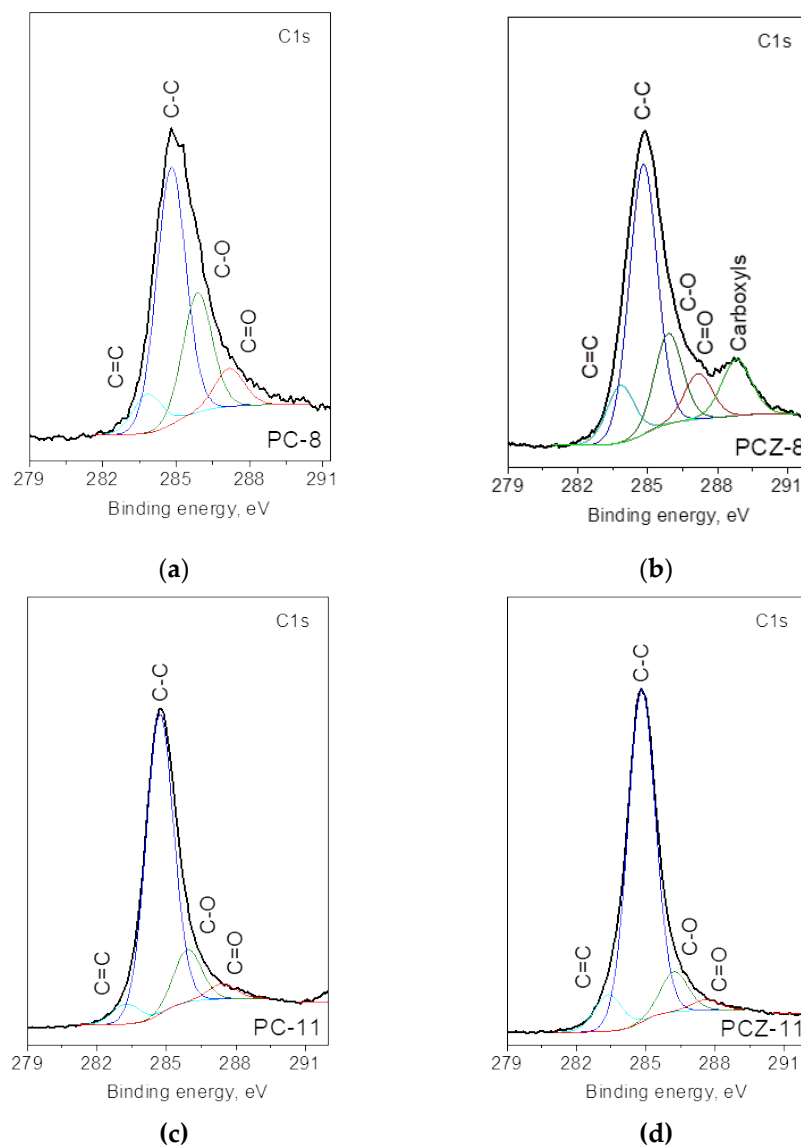

**Figure S2.** XPS spectra in the energy regions of C1s for pyrolyzed SCGs obtained in CO<sub>2</sub> flow with and without ash (a, b) and their high-temperature analogues (c, d).

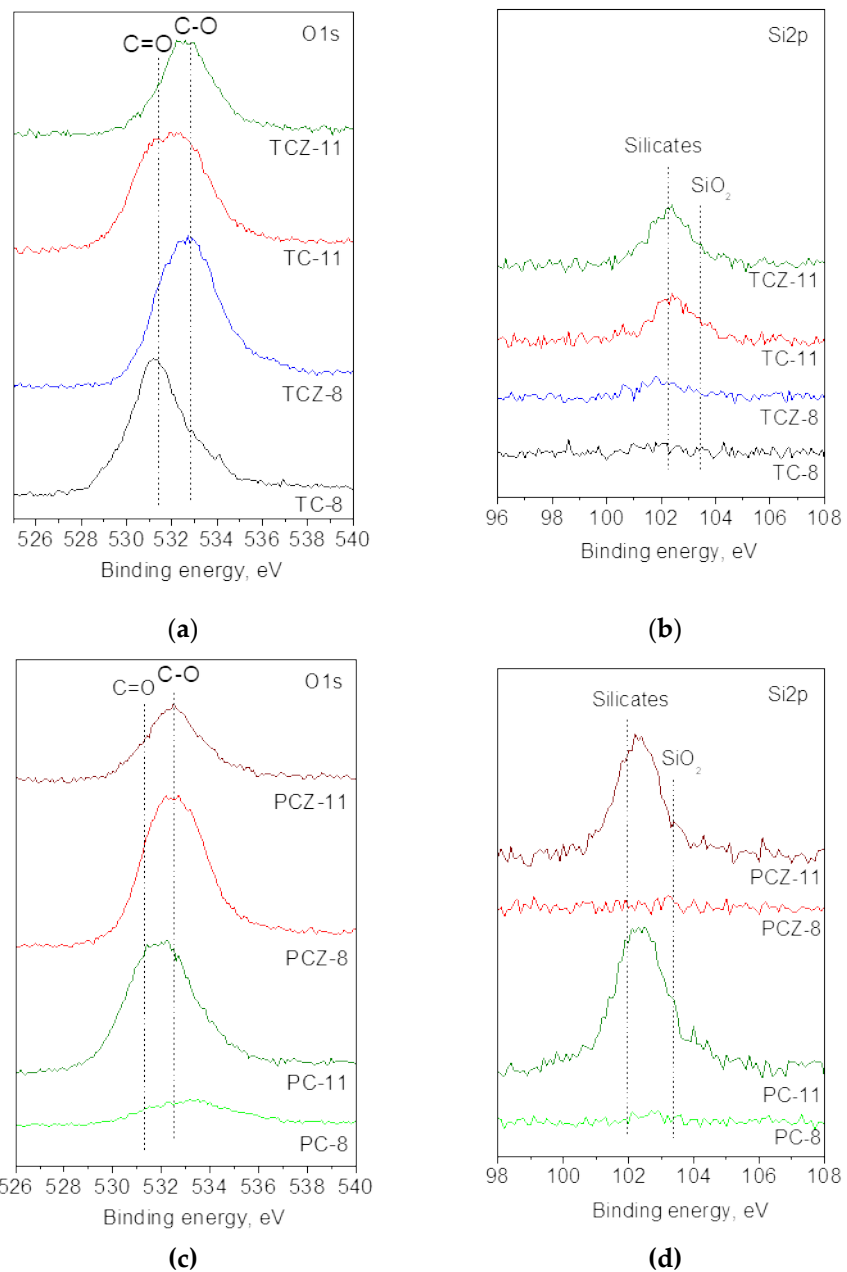

**Figure S3.** XPS spectra in the energy regions of O 1s and Si 2p for pyrolyzed SCGs in fixed-bed (a, b) and in CO<sub>2</sub> flow (c, d), respectively.

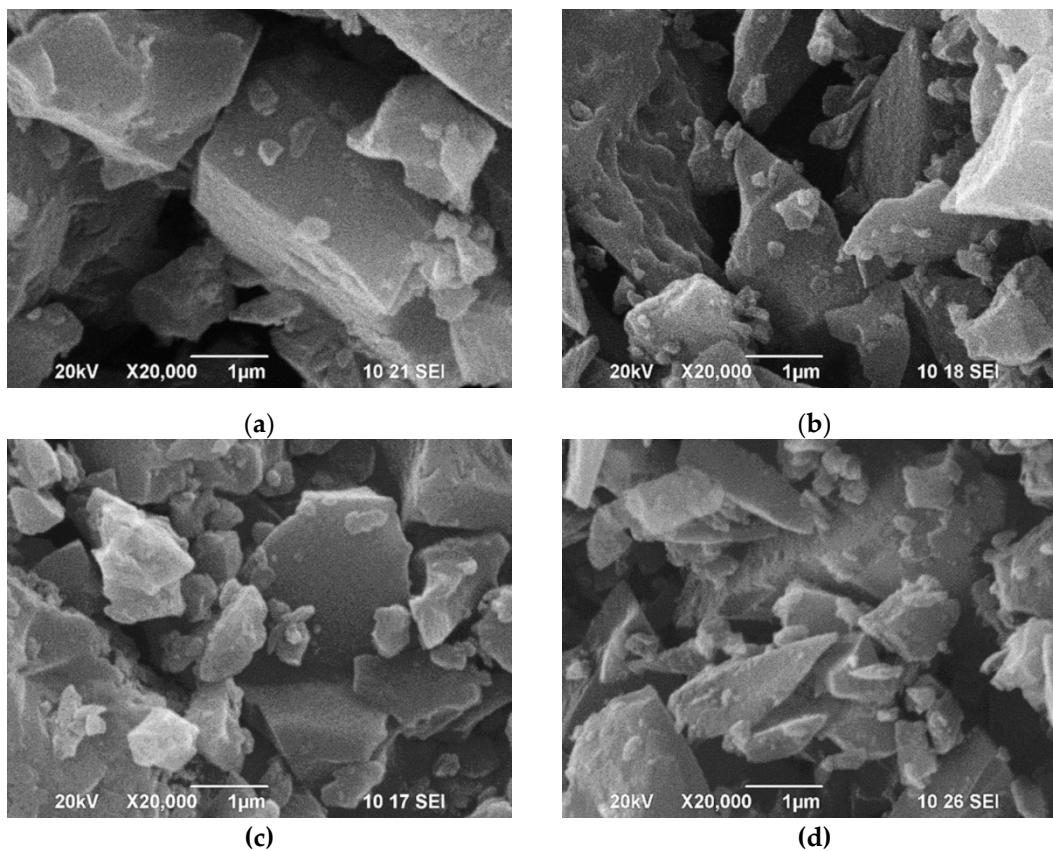

**Figure S4.** SEM images of (a) TC-11, (b) TCZ-11, (c) PC-11, and (d) PCZ-11 obtained after high-temperature pyrolysis.

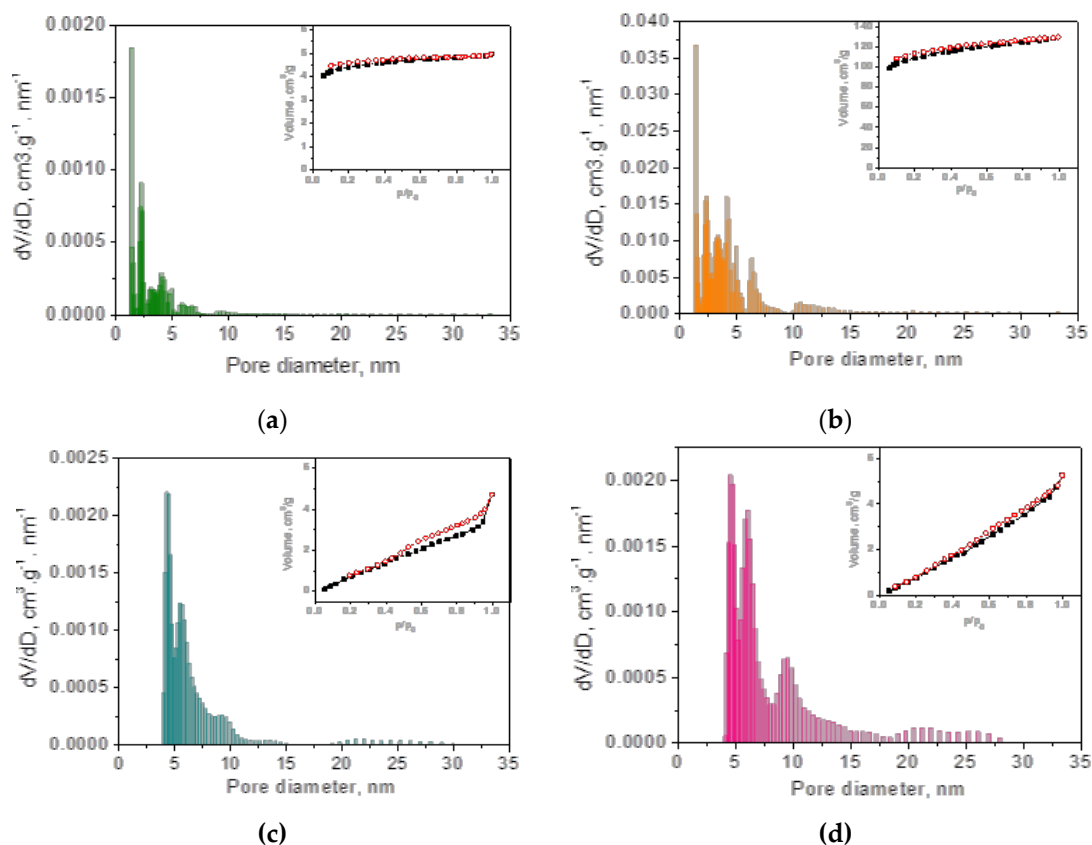

**Figure S5.** NLDFT pore size distribution of the (a) TC-8, (b) TCZ-8, (c) PC-8, (d) PCZ-8. The corresponding nitrogen adsorption-desorption isotherms are shown as insets.

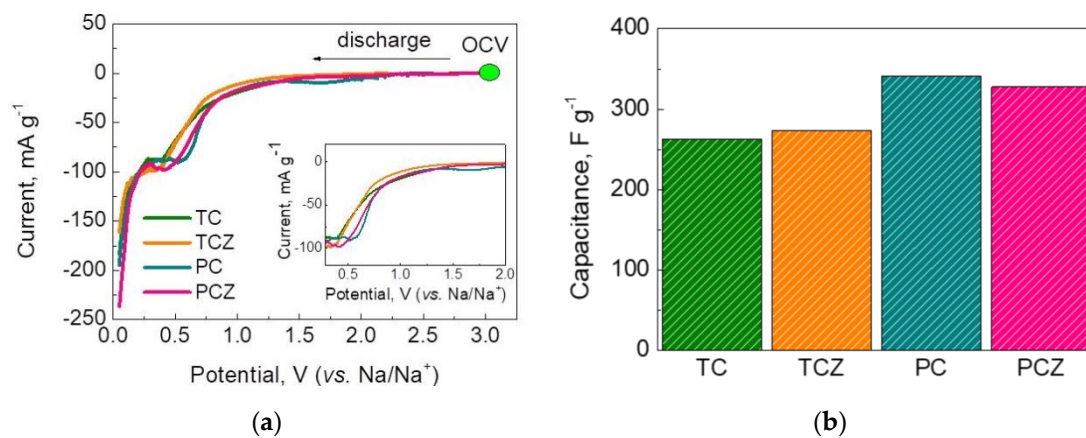

**Figure S6.** CV curves during the first cathodic cycle at 0.01 mV s<sup>-1</sup> scan rate (a) and the calculated capacitance in the potential window 2.0 - 0.3 V (b).

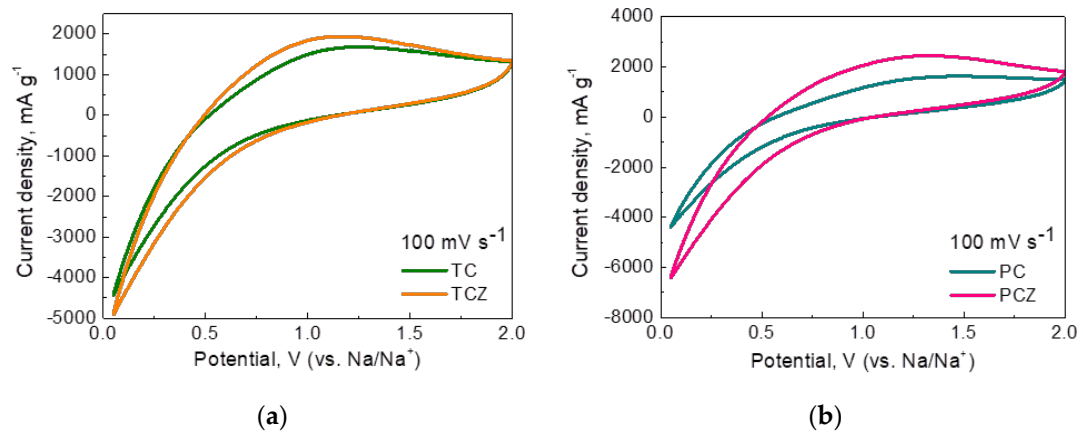

**Figure S7.** CV curves of the SCG derived carbon at 100 mV s<sup>-1</sup>.
